# Supplementary material for: Boswellia Essential Oil: Natural Antioxidant as an Effective Antimicrobial and Anti-Inflammatory Agent
Source: MDPI journal article supplement (doi:10.3390/antiox12101807), 2023-09-27

**Table S1. Interaction of the enantiomers of some chemical compounds from *Boswellia* oil with the bacterial TyrRS**

| S/No | Enantiomers of chemicals compounds from frankincense oil | Binding energies (kcal/mol) | Binding interaction (1JJ + compound)                                   |
|------|----------------------------------------------------------|-----------------------------|------------------------------------------------------------------------|
| 1    | (-)-Camphene                                             | -5.5                        | <b>Pi-Alkyl:</b> PHE273, PHE306                                        |
| 2    | (+)-Camphene                                             | -5.6                        | Nil                                                                    |
| 3    | (+)-Linalyl acetate                                      | <b>-5.8</b>                 | <b>H:</b> ASN124                                                       |
| 4    | Linalyl acetate, (-)-                                    | <b>-5.2</b>                 | <b>H:</b> PHE273<br><b>Pi-Sigma:</b> PHE273<br><b>Pi-Alkyl:</b> PHE306 |
| 5    | alpha-Pinene, (-)-                                       | -8.2                        | <b>Pi-Alkyl:</b> PHE273, PHE306                                        |
| 6    | alpha-Pinene, (+)-                                       | -8.2                        | Nil                                                                    |
| 7    | beta-Pinene, (-)-                                        | -8.2                        | Nil                                                                    |
| 8    | beta-Pinene, (+)-                                        | -8.2                        | Nil                                                                    |
| 9    | Linalool, (-)-                                           | <b>-5.1</b>                 | <b>H:</b> TYR170, GLN174<br><b>Alkyl/Pi-Alkyl:</b> TYR36, LEU70        |
| 10   | Linalool, (+)-                                           | <b>-5.4</b>                 | <b>H:</b> THR75<br><b>Alkyl:</b> CYS37                                 |
| 11   | D-Limonene                                               | -5.8                        | <b>Alkyl:</b> CYS37, LEU70, ILE200                                     |

**Figure S1. 3D and 2D display of some of the interaction between the enantiomers of the chemical compounds from *Boswellia* oil and bacterial TyrRS**

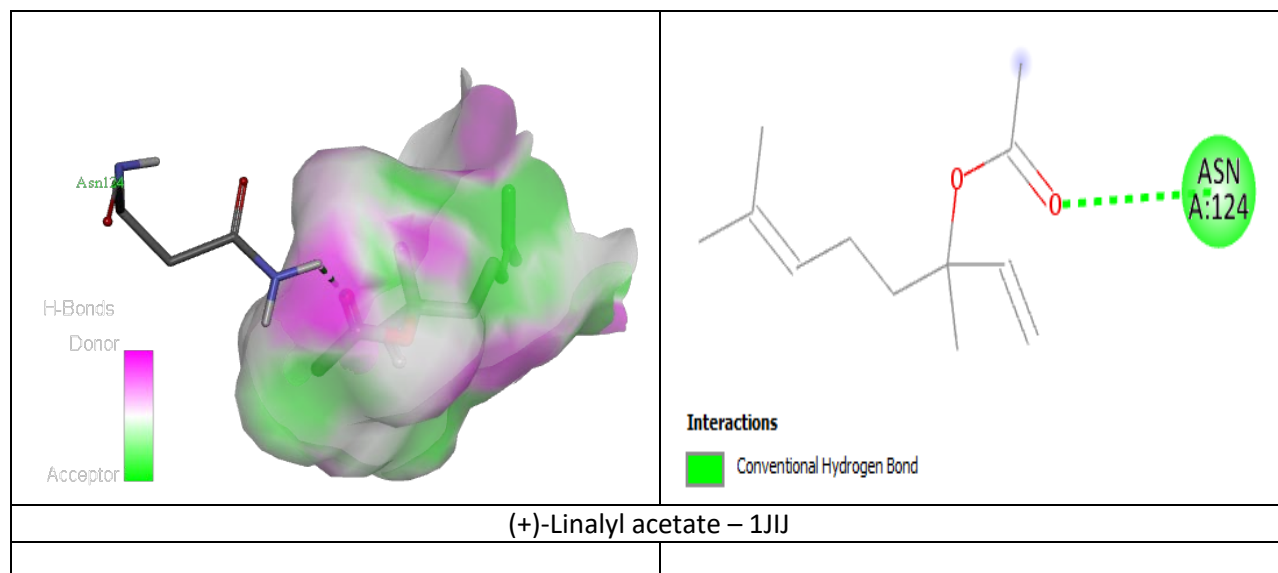

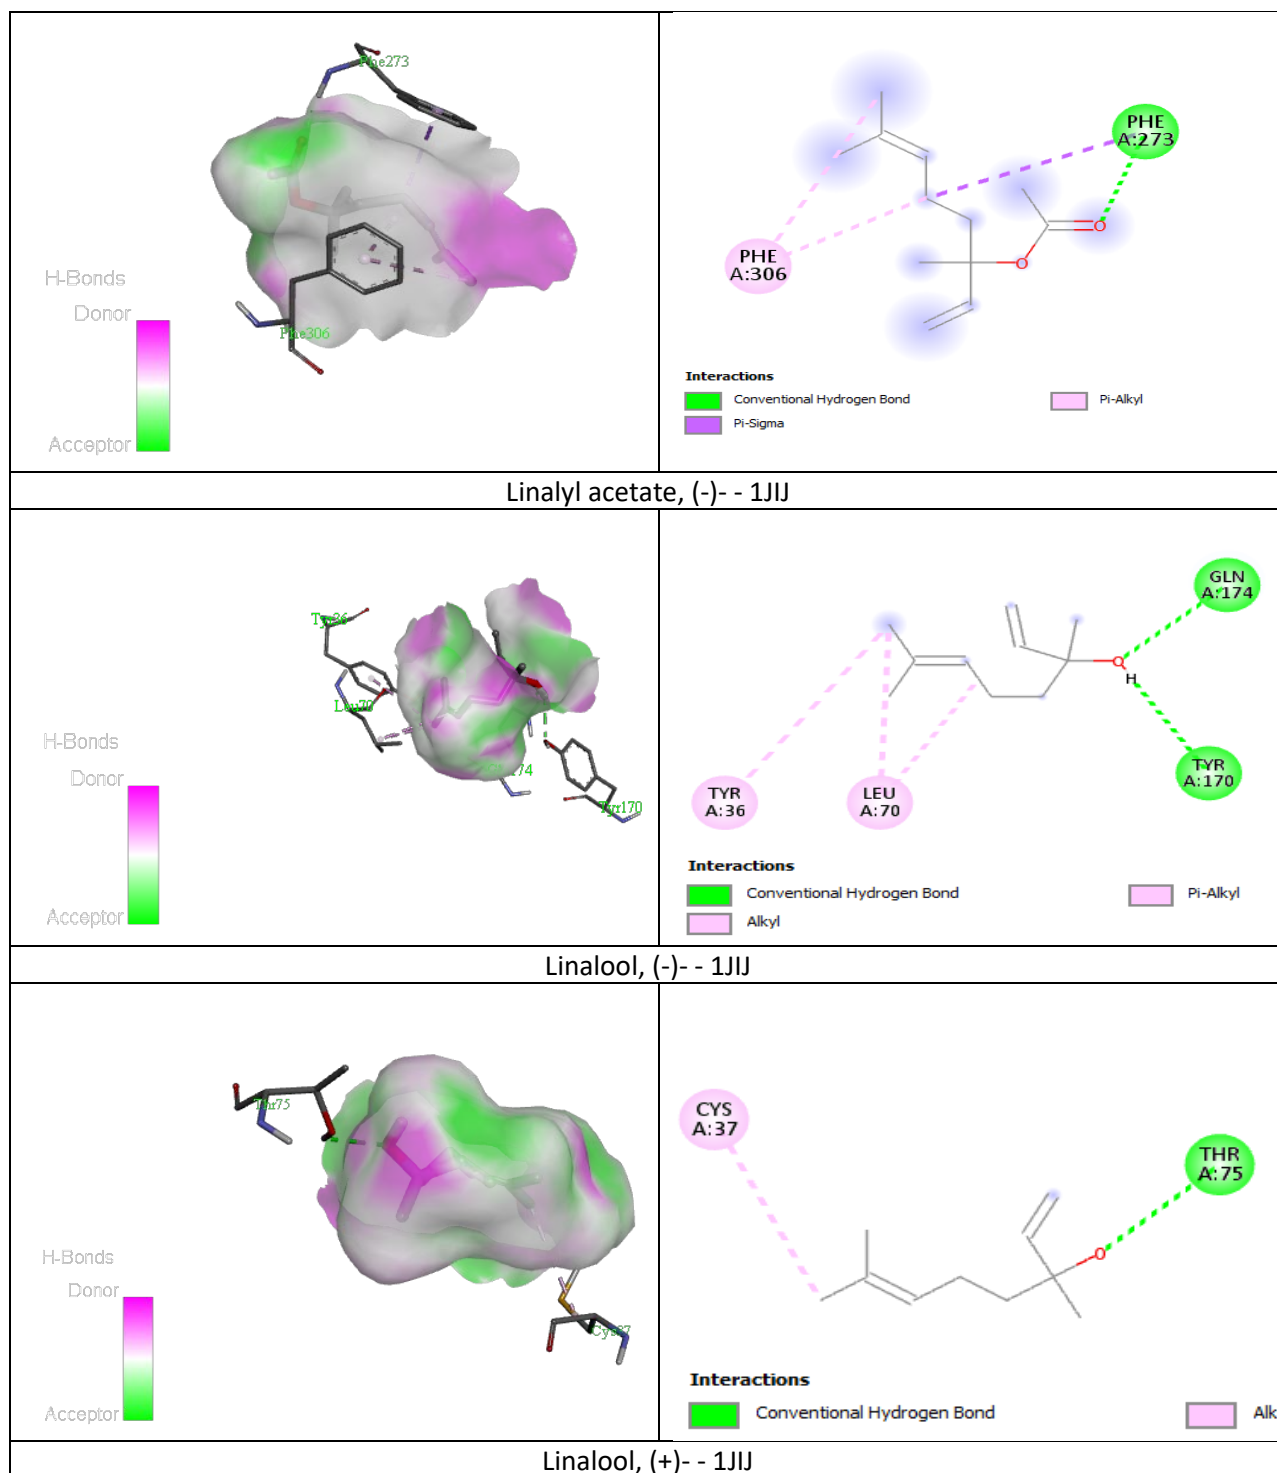

**Table S2. Interaction of the enantiomers of some chemical compounds from *Boswellia* oil with the fungal 1,3- $\beta$ -glucan synthase**

| S/No | Enantiomers of chemicals compounds from frankincense oil | Binding energies (kcal/mol) | Binding interaction (7XE4 + compound)                                         |
|------|----------------------------------------------------------|-----------------------------|-------------------------------------------------------------------------------|
| 1    | (-)-Camphene                                             | -6.1                        | Van der Waals: ILE1362, ILE1363<br>Alkyl/Pi-Alkyl: LEU1308, PHE1366           |
| 2    | (+)-Camphene                                             | -6.3                        | Van der Waals: PHE1363<br>Alkyl/Pi-Alkyl: ILE1304, LEU1308, ILE1362, PHE1366  |
| 3    | (+)-Linalyl acetate                                      | -5.7                        | Pi-Sigma: PHE1366<br>Alkyl: ILE1304, LEU1308                                  |
| 4    | Linalyl acetate, (-)-                                    | -5.3                        | H: SER1478<br>Alkyl/Pi-Alkyl: ILE1304, LEU1308, ILE1362, PHE1366, PHE1475     |
| 5    | alpha-Pinene, (-)-                                       | -8.3                        | Nil                                                                           |
| 6    | alpha-Pinene, (+)-                                       | -8.4                        | Nil                                                                           |
| 7    | beta-Pinene, (-)-                                        | -8.4                        | Nil                                                                           |
| 8    | beta-Pinene, (+)-                                        | -8.4                        | Nil                                                                           |
| 9    | Linalool, (-)-                                           | -4.7                        | Alkyl/Pi-Alkyl: ILE1304, PHE1366, PHE1370                                     |
| 10   | Linalool, (+)-                                           | -4.9                        | Alkyl/Pi-Alkyl: ILE1304, LEU1308, PHE1363, PHE1366, PHE1370, PHE1475, LEU1479 |
| 11   | D-Limonene                                               | -5.8                        | Pi-Sigma: PHE1366<br>Alkyl/Pi-Alkyl: ILE1304, LEU1308, ILE1362, PHE1363       |

**Figure S2. 3D and 2D display of some of the interaction between the enantiomers of the chemical compounds from *Boswellia* oil and fungal 1,3- $\beta$ -glucan synthase**

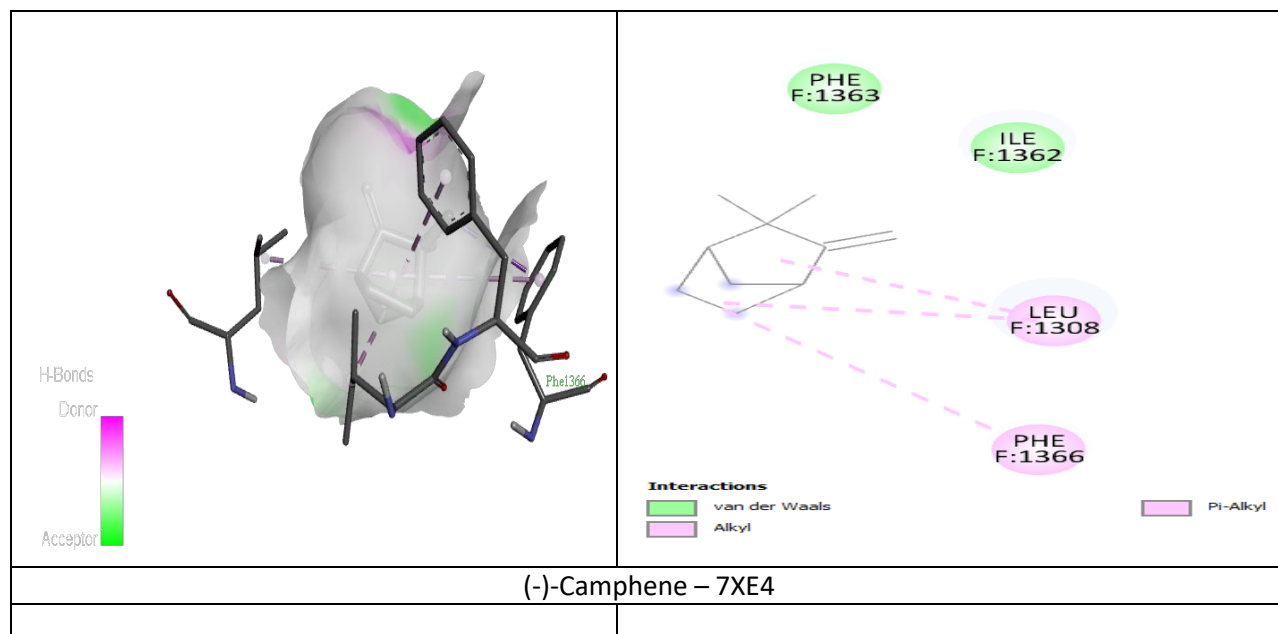

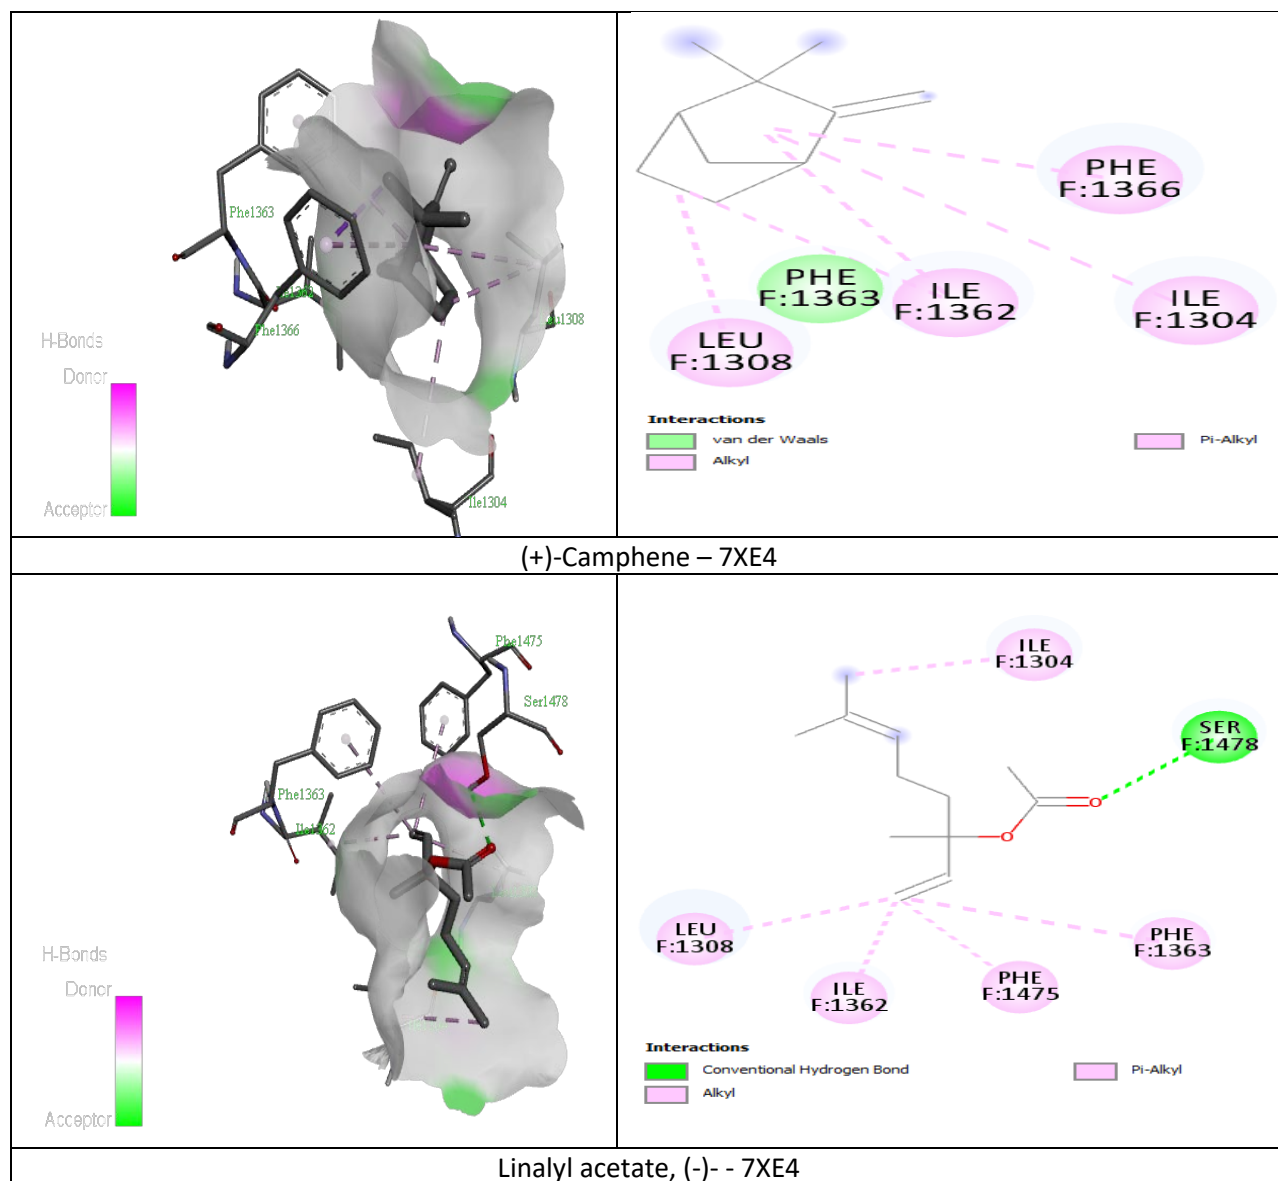

**Table S3. Interaction of the enantiomers of some chemical compounds from *Boswellia* oil with the bacterial DNA gyrase**

| S/No | Enantiomers of chemicals compounds from frankincense oil | Binding energies (kcal/mol) | Binding interaction (1AB4 + compound)                       |
|------|----------------------------------------------------------|-----------------------------|-------------------------------------------------------------|
| 1    | (-)-Camphene                                             | -5.0                        | Van der Waals: TYR100<br>Alkyl/Pi-Alkyl: ILE130, PHE513     |
| 2    | (+)-Camphene                                             | -5.6                        | Nil                                                         |
| 3    | (+)-Linalyl acetate                                      | -4.7                        | H: LYS129<br>Alkyl/Pi-Alkyl: TYR100, ALA128, ILE130, PHE513 |

|    |                       |      |                                                   |
|----|-----------------------|------|---------------------------------------------------|
| 4  | Linalyl acetate, (-)- | -5.0 | C-H: PHE513<br>Alkyl: ALA128, LYS129, ILE130      |
| 5  | alpha-Pinene, (-)-    | -6.7 | Nil                                               |
| 6  | alpha-Pinene, (+)-    | -8.0 | Nil                                               |
| 7  | beta-Pinene, (-)-     | -8.0 | Nil                                               |
| 8  | beta-Pinene, (+)-     | -8.0 | Nil                                               |
| 9  | Linalool, (-)-        | -4.7 | Pi-Alkyl:TYR266                                   |
| 10 | Linalool, (+)-        | -4.9 | H: GLU369<br>Alkyl: LEU488                        |
| 11 | D-Limonene            | -5.2 | Alkyl/Pi-Alkyl: TYR100, ALA128, ILE130,<br>PHE513 |

**Figure S3. 3D and 2D display of some of the interaction between the enantiomers of the chemical compounds from *Boswellia* oil and bacterial DNA gyrase**

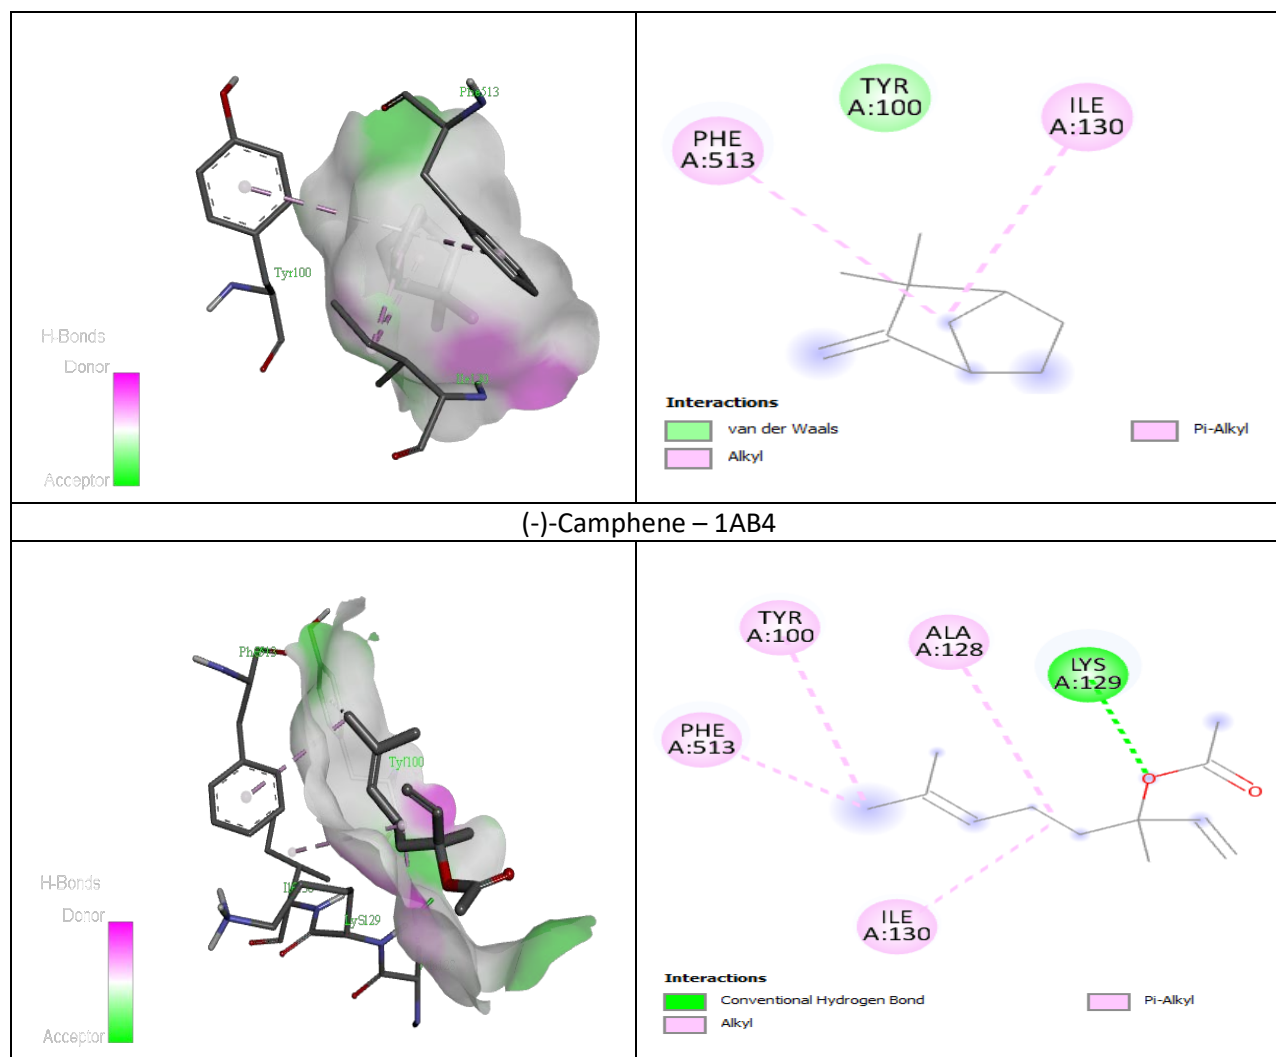

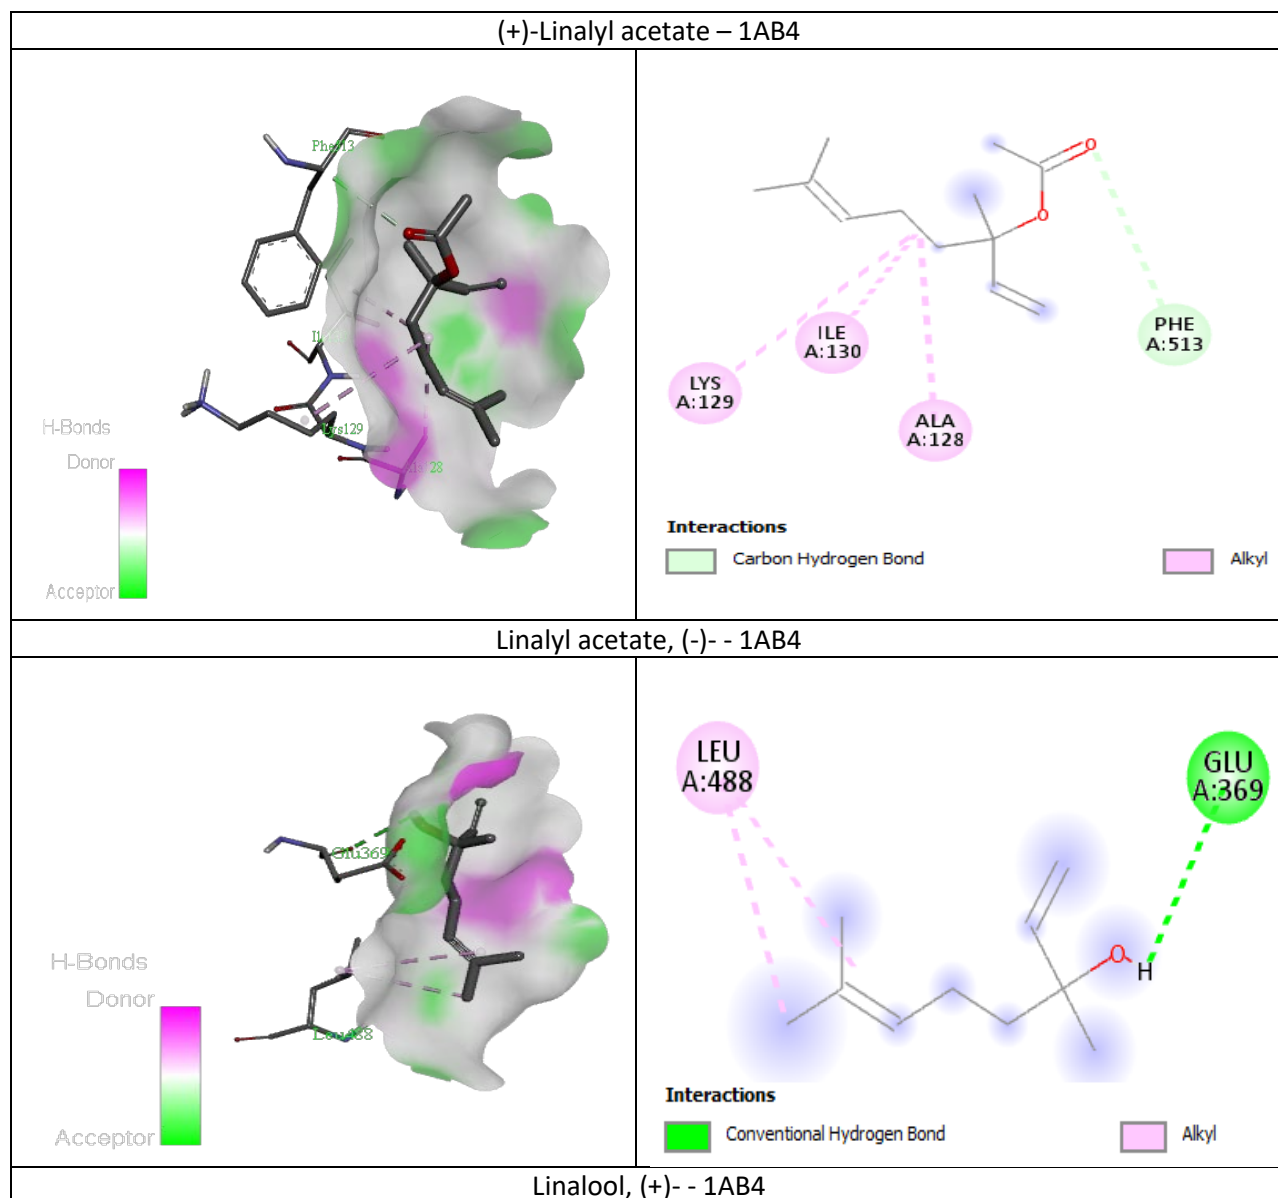

**Table S4.** Interaction of the enantiomers of some chemical compounds from *Boswellia* oil with the bacterial peptide deformylase

| S/No | Enantiomers of chemicals compounds from frankincense oil | Binding energies (kcal/mol) | Binding interaction (1IX1 + compound)                                  |
|------|----------------------------------------------------------|-----------------------------|------------------------------------------------------------------------|
| 1    | (-)-Camphene                                             | -5.1                        | Nil                                                                    |
| 2    | (+)-Camphene                                             | -5.3                        | Nil                                                                    |
| 3    | (+)-Linalyl acetate                                      | <b>-5.3</b>                 | H: ILE45, GLY46<br>C-H: GLY44<br>Alkyl/Pi-Alkyl: TYR88, LEU127, VAL130 |

|    |                       |      |                                                                                                   |
|----|-----------------------|------|---------------------------------------------------------------------------------------------------|
| 4  | Linalyl acetate, (-)- | -5.4 | H: ARG115<br>Alkyl/Pi-Alkyl: ARG71, PHE73,PHE120                                                  |
| 5  | alpha-Pinene, (-)-    | -6.9 | Nil                                                                                               |
| 6  | alpha-Pinene, (+)-    | -6.9 | Nil                                                                                               |
| 7  | beta-Pinene, (-)-     | -6.9 | Nil                                                                                               |
| 8  | beta-Pinene, (+)-     | -6.9 | Nil                                                                                               |
| 9  | Linalool, (-)-        | -5.7 | H: ILE45, GLY46<br>Alkyl/Pi-Alkyl: CYS92, LEU93, LEU127,<br>VAL130, CYS131, HIS134                |
| 10 | Linalool, (+)-        | -5.6 | Unfavorable Donor-Donor: GLY46<br>Alkyl/Pi-Alkyl: ILE45, LEU93, LEU127,<br>VAL130, CYS131, HIS134 |
| 11 | D-Limonene            | -5.4 | Alkyl/Pi-Alkyl: ILE45, LEU93, CYS131,<br>HIS134                                                   |

**Figure S4. 3D and 2D display of some of the interaction between the enantiomers of the chemical compounds from *Boswellia* oil and bacterial peptide deformylase**

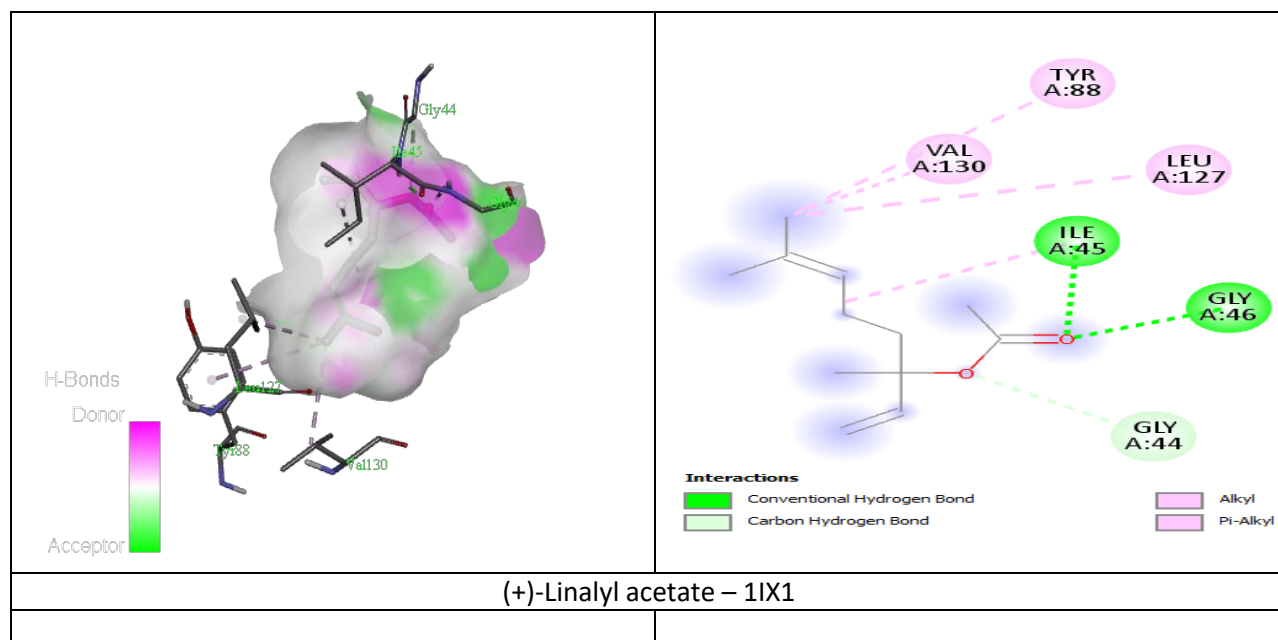

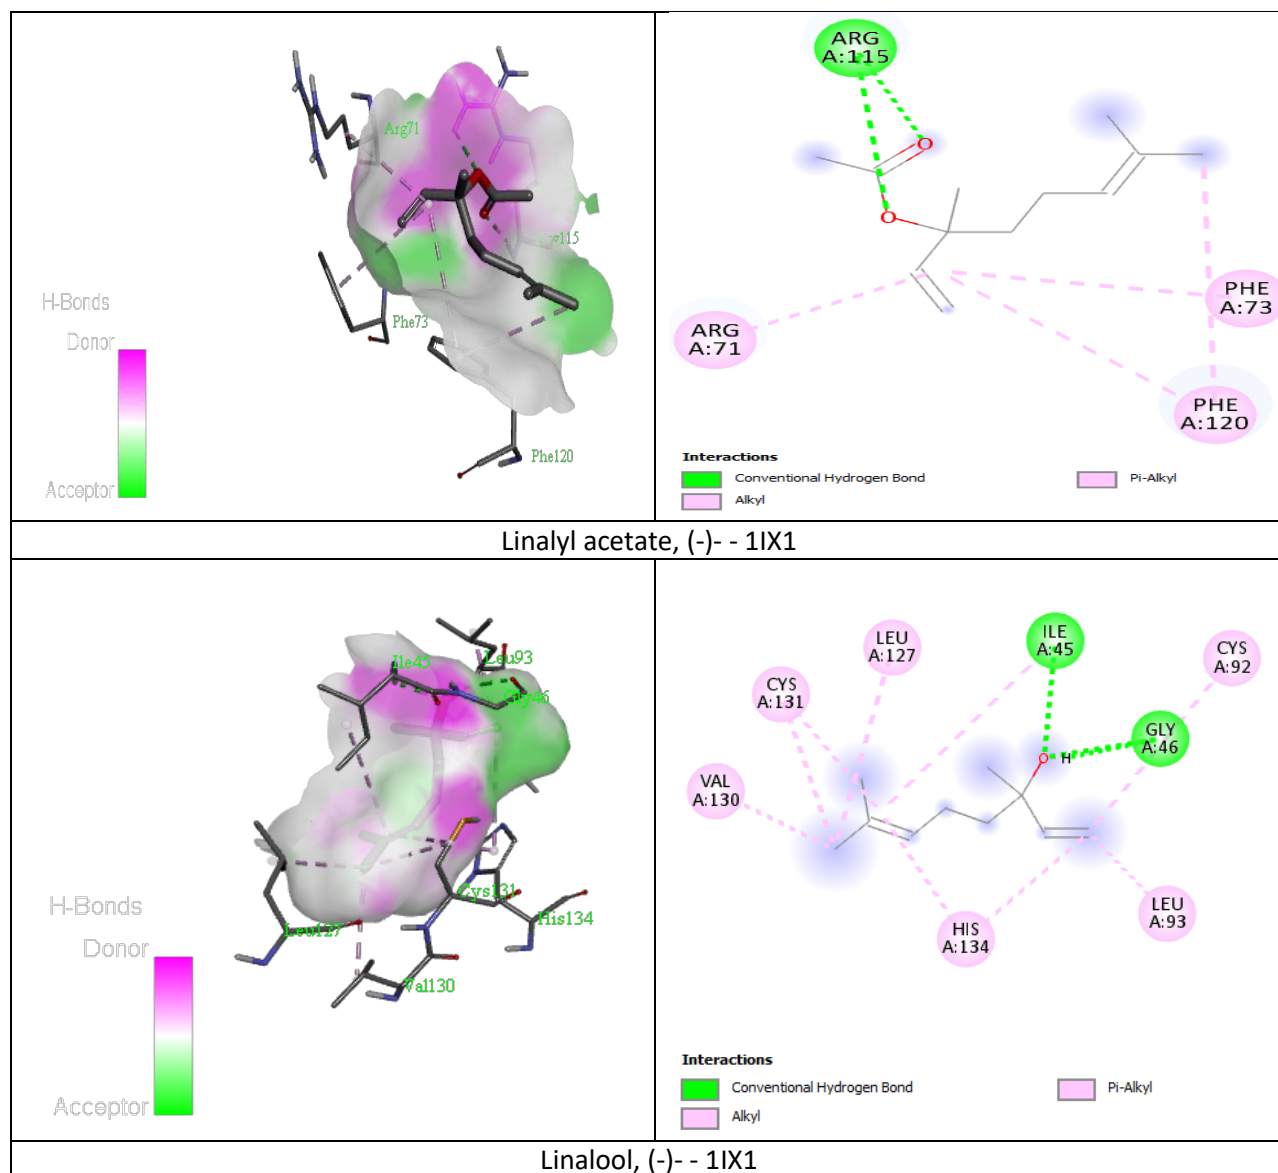

Supplement: s1 [file s1]
