# Supplementary material for: Boswellia Essential Oil: Natural Antioxidant as an Effective Antimicrobial and Anti-Inflammatory Agent
Source: MDPI journal article supplement (doi:10.3390/antiox12101807), 2023-09-27
Supplement: s1 [file s1]

# Chemical composition of the tested frankincense essential oil detected by GC-

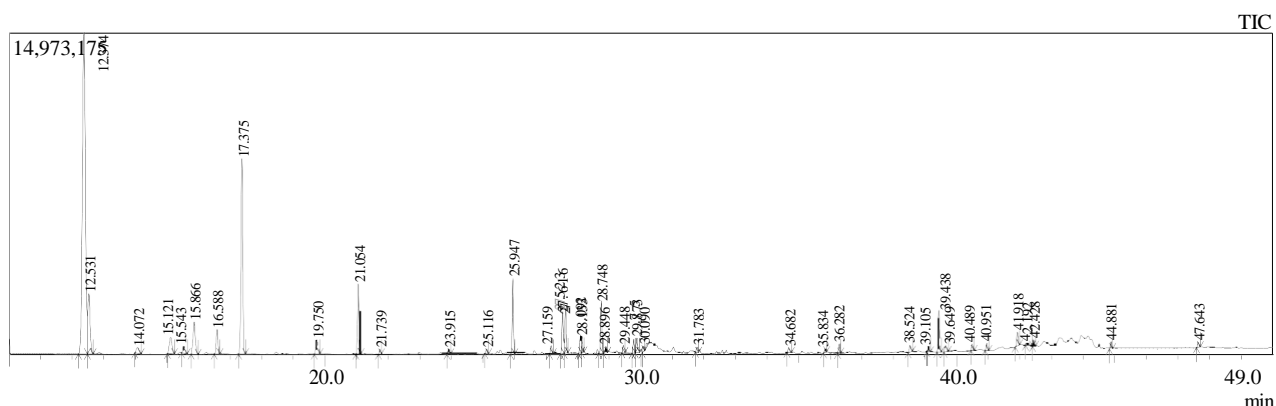

Quantitative Result Table

| ID# | Name                        | R.Time | m/z | Area      | Height   | Conc. |
|-----|-----------------------------|--------|-----|-----------|----------|-------|
| 1   | .alpha.-Pinene              | 12.374 | TIC | 100975318 | 14911684 | 39.34 |
| 2   | .alpha.-Phellandrene        | 12.531 | TIC | 14035230  | 2821573  | 5.48  |
| 3   | Camphene                    | 14.072 | TIC | 2214014   | 323220   | 0.77  |
| 4   | .beta.-Pinene               | 15.121 | TIC | 4838912   | 788419   | 1.89  |
| 5   | 3-Carene                    | 15.543 | TIC | 1713604   | 358685   | 0.67  |
| 6   | Thujene                     | 15.866 | TIC | 7676176   | 1503896  | 3.00  |
| 7   | .beta.-Myrcene              | 16.588 | TIC | 4448378   | 1159333  | 1.74  |
| 8   | Limonene                    | 17.375 | TIC | 35391255  | 9071728  | 13.79 |
| 9   | Eucalyptol                  | 19.750 | TIC | 3227237   | 678612   | 1.21  |
| 10  | p-Cimene                    | 21.054 | TIC | 10768301  | 3268943  | 4.21  |
| 11  | Methyl 4,6-decadienyl ether | 21.739 | TIC | 615303    | 218897   | 0.24  |
| 12  | Copaene                     | 23.915 | TIC | 1004088   | 247989   | 0.39  |
| 13  | .alpha.-Bourbonene          | 25.116 | TIC | 790325    | 224944   | 0.33  |
| 14  | Acetic acid, octyl ester    | 25.947 | TIC | 9494968   | 3522649  | 3.71  |
| 15  | tau-Elementene              | 27.159 | TIC | 1290198   | 380552   | 0.51  |
| 16  | Linalool                    | 27.523 | TIC | 6322287   | 1961389  | 2.47  |
| 17  | Linalool acetate            | 27.616 | TIC | 6571945   | 2105615  | 2.58  |
| 18  | Menthyl acetate             | 28.092 | TIC | 5186571   | 858045   | 2.03  |
| 19  | Caryophyllene               | 28.092 | TIC | 5186571   | 858045   | 2.03  |
| 20  | Isomenthone                 | 28.748 | TIC | 7302245   | 2452804  | 2.86  |
| 21  | Geranyl acetate             | 28.896 | TIC | 929487    | 319979   | 0.40  |
| 22  | Bornyl acetate              | 29.448 | TIC | 1887741   | 360891   | 0.75  |
| 23  | Menthone                    | 29.775 | TIC | 1859332   | 637164   | 0.73  |
| 24  | 4-Terpinenol                | 29.873 | TIC | 2465736   | 689143   | 0.97  |
| 25  | gamma.-Cadinene             | 30.090 | TIC | 564358    | 230047   | 0.24  |
| 26  | p-menth-1-en-8-ol           | 31.783 | TIC | 1250452   | 300240   | 0.46  |
| 27  | Carvona                     | 34.682 | TIC | 1223310   | 242922   | 0.47  |
| 28  | p-Cymen-8-ol                | 35.834 | TIC | 770022    | 215318   | 0.31  |
| 29  | Verbenone                   | 36.282 | TIC | 1294327   | 454547   | 0.51  |
| 30  | beta.-Elementene            | 38.524 | TIC | 1288665   | 343251   | 0.50  |
| 31  | Caryophyllene oxide         | 39.438 | TIC | 5785928   | 1949184  | 2.26  |
| 32  | .tau.-Cadinol               | 39.649 | TIC | 1251460   | 291428   | 0.47  |
| 33  | Verticiol                   | 40.951 | TIC | 1165577   | 351850   | 0.46  |
| 34  | Eugenol                     | 41.918 | TIC | 2509467   | 706809   | 0.98  |
| 35  | Cinnamyl acetate            | 42.201 | TIC | 1204282   | 179488   | 0.48  |
| 36  | Cinnamaldehyde, (E)-        | 42.428 | TIC | 854994    | 310503   | 0.38  |

\*Residual non-natural compounds represent the difference of 0.41%.
